# Supplementary material
Source: PubMed Central journal article supplement (PMC2781984)

## Supplementary data

### GENERATION OF DIGITAL RESPONSES IN STRESS SENSORS

Tània Martíáñez, Sílvia Francès, and José M. López

#### Supplementary experimental procedures

##### *In silico analysis*

BLAST (Basic Local Alignment Search Tool, <http://www.ncbi.nlm.nih.gov/BLAST/>) was used to obtain the AMPK orthologs of *Xenopus laevis* from the AMPK human sequences. AMPK sequences from different species were obtained from Entrez Gene Database and a phylogenetic tree was created using CLUSTAL program.

##### *Oocyte isolation and treatment*

Oocytes were obtained from sexually mature *Xenopus laevis* females (purchased from Centre d'Élevage de Xenopes, Montpellier, France), anesthetized in 0.02% benzocaine and portions of ovary were removed through a small incision on the abdomen. The incision was sutured and the animal was returned to a separate tank until it had fully recovered from the anaesthesia. It was then returned to a large tank in which all the frogs were kept for at least 4 weeks until the next surgery. The tissue was examined to ensure the ovaries were healthy and dissected in small pieces. Oocytes were defolliculated for 1-1.5 hr at room temperature with collagenase/dispase (0.8 mg/ml (Sigma), 0.48 mg/ml (Roche)) in MBS (5 mM HEPES, 88 mM NaCl, 1 mM KCl, 1 mM MgSO<sub>4</sub>·7H<sub>2</sub>O, 2.5 mM NaHCO<sub>3</sub>, 0.7 mM CaCl<sub>2</sub>, pH 7.8) with agitation. The oocytes were then washed thoroughly with MBS and transferred to petri dishes. Stage VI oocytes were sorted manually and incubated overnight in MBS at 18°C. The next day, healthy survivors were selected and transferred to a fresh petri dish containing fresh MBS. Pools of oocytes were treated with drugs at the concentrations and times indicated.

##### *RT-PCR*

cDNAs were amplified by PCR with specific primers (Sigma).  
Sense  $\alpha$ 1: 5'GCCGTCGACATGCGCAGGCTCAGTTCGCTC3'  
Antisense  $\alpha$ 1: 5'GCCGCGGCCGCGTACAAGCAGCAGCTCAGCACT3'  
Sense  $\beta$ 1: 5'GCCGGATCCATGGGGAACACGAGCAGTGAACGACC3'  
Antisense  $\beta$ 1: 5'GCCGAATTCTCATATTGGTTTGTACAGCAAT3'  
Sense  $\beta$ 2: 5'GCCAAGCTTATGGGTAACACTGCAAGTGATCGCAT3'  
Antisense  $\beta$ 2: 5'GCCGAATTCCTAAATTGGCTTGTACAATAAAA3'  
Sense  $\gamma$ 1: 5'GCCGGATCCATGGAACCCGTTCCGTTAT3'  
Antisense  $\gamma$ 1: 5'GCCGAATTCTTAAATTAAGCTCTTTTCGCCCCC3'  
Sense  $\gamma$ 2: 5'GCCGGATCCATGGGAAGTACAGTACAGTCATGGA 3'  
Antisense  $\gamma$ 2: 5'GCCGAATTCTTTGGAGCTGGTCGGGACAA3'  
Sense  $\gamma$ 3: 5'GCCAAGCTTATGGAGCAAGAGGAGTCTCA3'  
Antisense  $\gamma$ 3: 5'GCCGAATTCTCACAAAGGAATTGCGGTCAA3'

##### *Oocyte nuclei isolation*

Healthy stage VI oocytes were selected and rinsed in supplemented isolation buffer, which is composed of 20 mM Tris HCl (pH 7.5), 75 mM KCl, 7 mM MgCl<sub>2</sub>, 0.1 mM EDTA, 0.1 mM EGTA, 2 mM dithiothreitol, with protease and phosphatase inhibitors as previously described. Each nucleus (germinal vesicle) was manually removed and separated from the cytoplasm by using watchmaker's forceps in isolation buffer at room temperature and transferred to a tube kept on ice. After 10 nuclei had been collected they were disrupted by pipetting repeatedly through a 200  $\mu$ l micropipette tip, suspended in SDS sample buffer, boiled for 5 min, and subjected to electrophoresis on 10% polyacrylamide gel. The cytoplasm from 1 oocyte was also collected and cleared by centrifugation at 14.500 rpm for 5 min and the supernatant processed for immunoblotting.

## Supplementary results

### *AMPK orthologs in Xenopus laevis genome*

Since there are no previous publications about *Xenopus* AMPK, we performed in silico analysis of *Xenopus* AMPK subunits and compare them with the mammalian orthologs. The public access to human and *Xenopus* sequences allowed us to search with BLAST (Basic Local Alignment Search Tool, <http://www.ncbi.nlm.nih.gov/BLAST/>) to obtain the orthologs of *Xenopus laevis* from the human AMPK subunits sequences (Fig. S1A). For *Xenopus*  $\alpha 1$  we found two different sequences (BC084741 and AF340021) with a high homology (96% identity in aminoacids) and we considered them as the same subunit. Moreover, a phylogenetic tree was created using CLUSTAL program, showing that *Xenopus*  $\alpha$  subunit is closer to  $\alpha 1$  than to  $\alpha 2$  subunits from other species (Fig. S1B). We have not found the *Xenopus*  $\alpha 2$  homolog sequence in Entrez Gene Database, probably due to the incomplete sequence of *Xenopus* genome. In Fig. S1C we schematize the different subunits of *Xenopus* AMPK, the domains and the key aminoacids described to be important for AMPK regulation in mammals. *Xenopus*  $\alpha 1$  subunit contains the kinase domain and a Thr184 (equivalent to human Thr172, with the aminoacids surrounding this phosphorylation site well preserved), the autoinhibitory domain (AID) and the aminoacids Val307, Leu337 (important for stabilization of the autoinhibitory conformation (1)) and Ser495, an autophosphorylation site containing also a regulatory site for PKA and PKB/Akt (2). *Xenopus*  $\beta 1$  and  $\beta 2$  subunits contain the glycogen binding domain (GBD) and the complex interaction domain (CIR). Finally, *Xenopus*  $\gamma$  subunits contain four tandem repeats of the CBS motif (responsible of AMP and ATP binding), and the inhibitory pseudosubstrate sequence well preserved (3).

In conclusion, the high similarity of *Xenopus* AMPK subunits with the mammalian orthologs makes of *Xenopus* an adequate model for studies of AMPK signalling.

## Supplementary references

1. Pang, T., Xiong, B. Li, J. Y., Qiu, B. Y., Jin, G. Z., Shen, J. K., and Li, J. (2007) *J Biol Chem* **282**, 495-506
2. Hurley, R. L., Barre, L. K., Wood, S. D., Anderson, K. A., Kemp, B. E., Means, A. R., and Witters, L. A. (2006) *J Biol Chem* **281**, 36662-36672
3. Scott, J. W., Ross, F. A., Liu, J. K., Hardie, D. G. (2007) *EMBO J* **26**, 806-815

## Supplementary figure legends

**Fig. S1.** *In silico* analysis and subcellular distribution of *Xenopus* AMPK. (A) Similarity grade between human and *Xenopus* AMPK is shown. Using BLAST (Basic local Alignment Search Tool) program the *Xenopus* orthologs sequences were obtained and compared to the human AMPK subunits sequences. The numeric value (P) indicates the coincidence probability at random: minor the value bigger the possibility that the sequences are related significantly. (B) Eukaryotic AMPK  $\alpha$  subunits comparison represented in a phylogenetic tree. Aminoacid sequences, obtained from public NCBI data bank, were aligned and a phylogenetic tree was generated with ClustalW program. (C) Conserved domain structures of *Xenopus* AMPK. The  $\alpha 1$  subunit contains the kinase domain and a Thr184 residue in its activation loop that must be phosphorylated for activity, an autoinhibitory domain (AID), and the aminoacids Val307, Leu337 and Ser495, which are important for regulation of AMPK activity. Both  $\beta$  subunits contain central glycogen-binding domains (GBD) and complex interaction domains (CIR) that are required for binding the  $\alpha$  and  $\gamma$  subunits. All three  $\gamma$  isoforms have a variable N-terminal length, and contain four cystathione b synthase motifs (CBS). Potentially, they are able to act in pairs, forming Bateman domains that can bind AMP or ATP. (D) AMPK $\alpha$  distribution in the cytosol and nucleus. AMPK $\alpha$  was quantified by densitometry from Western blots, as described in Fig. 1D, and expressed as percentage of AMPK in the cytosol or the nucleus referred to total AMPK in the extract. Results represent mean  $\pm$  SEM of three independent experiments.

**Fig. S2.** ACC phosphorylation with antimycin and hyperosmolar sorbitol. (A) Time course response of ACC and AMPK to 1.5  $\mu$ g/ml antimycin. (B) Time course response of ACC and AMPK to 400 mM

sorbitol. (C) Dose response of ACC and AMPK to antimycin. (D) Dose response of ACC and AMPK to sorbitol. Oocytes (stage VI) were treated with different concentrations of antimycin or sorbitol, collected and lysed at 4 hr to analyze pACC, ACC, pAMPK, and AMPK by Western blot. (E) ACC phosphorylation in individual oocytes treated with 0.1  $\mu\text{g/ml}$  antimycin. (F) ACC phosphorylation in individual oocytes treated with 200 mM sorbitol. Oocytes were incubated for 4 hr and pACC and ACC were measured by Western blot. Results are represented as pACC/ACC ratio, taken as maximum activity (100% value) the oocytes treated with 1.5  $\mu\text{g/ml}$  antimycin or 400 mM sorbitol (M). Each box represents one individual oocyte.

Figure S1

A

| Human sequences | <i>Xenopus</i> sequences | P value (DNA) | P value (protein)    |                      |
|-----------------|--------------------------|---------------|----------------------|----------------------|
| α1 NP_996790    | BC084741                 | α1            | $4 \times 10^{-93}$  | 0                    |
| α1 NP_996790    | AF340021                 | α1            | $1 \times 10^{-90}$  | 0                    |
| β1 NM_006253    | BC072961                 | β1            | $3 \times 10^{-24}$  | $2 \times 10^{-119}$ |
| β2 NM_005399    | BC053787                 | β2            | $8 \times 10^{-53}$  | $1 \times 10^{-129}$ |
| γ1 NM_002733    | BC073621                 | γ1            | $3 \times 10^{-17}$  | $1 \times 10^{-154}$ |
| γ2 NM_016203    | BC060444                 | γ2            | $1 \times 10^{-138}$ | 0                    |
| γ3 NM_017431    | BC043738                 | γ3            | $3 \times 10^{-5}$   | $4 \times 10^{-135}$ |

B

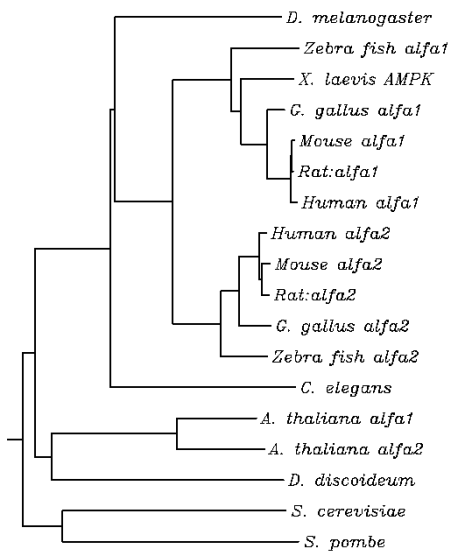

C

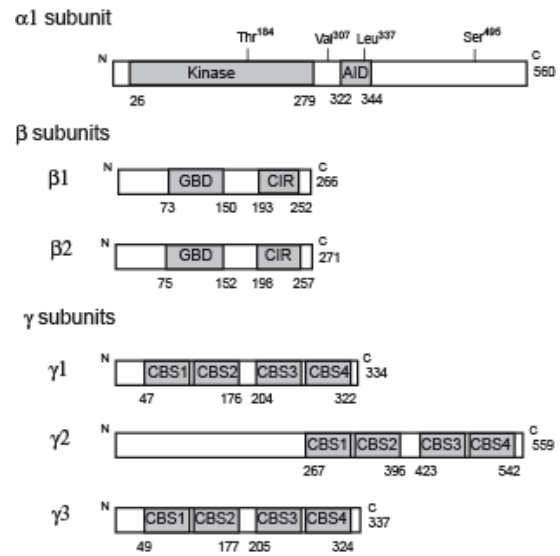

D

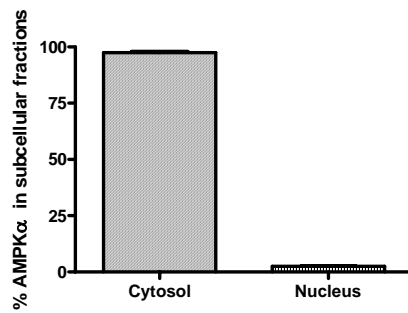

Figure S2

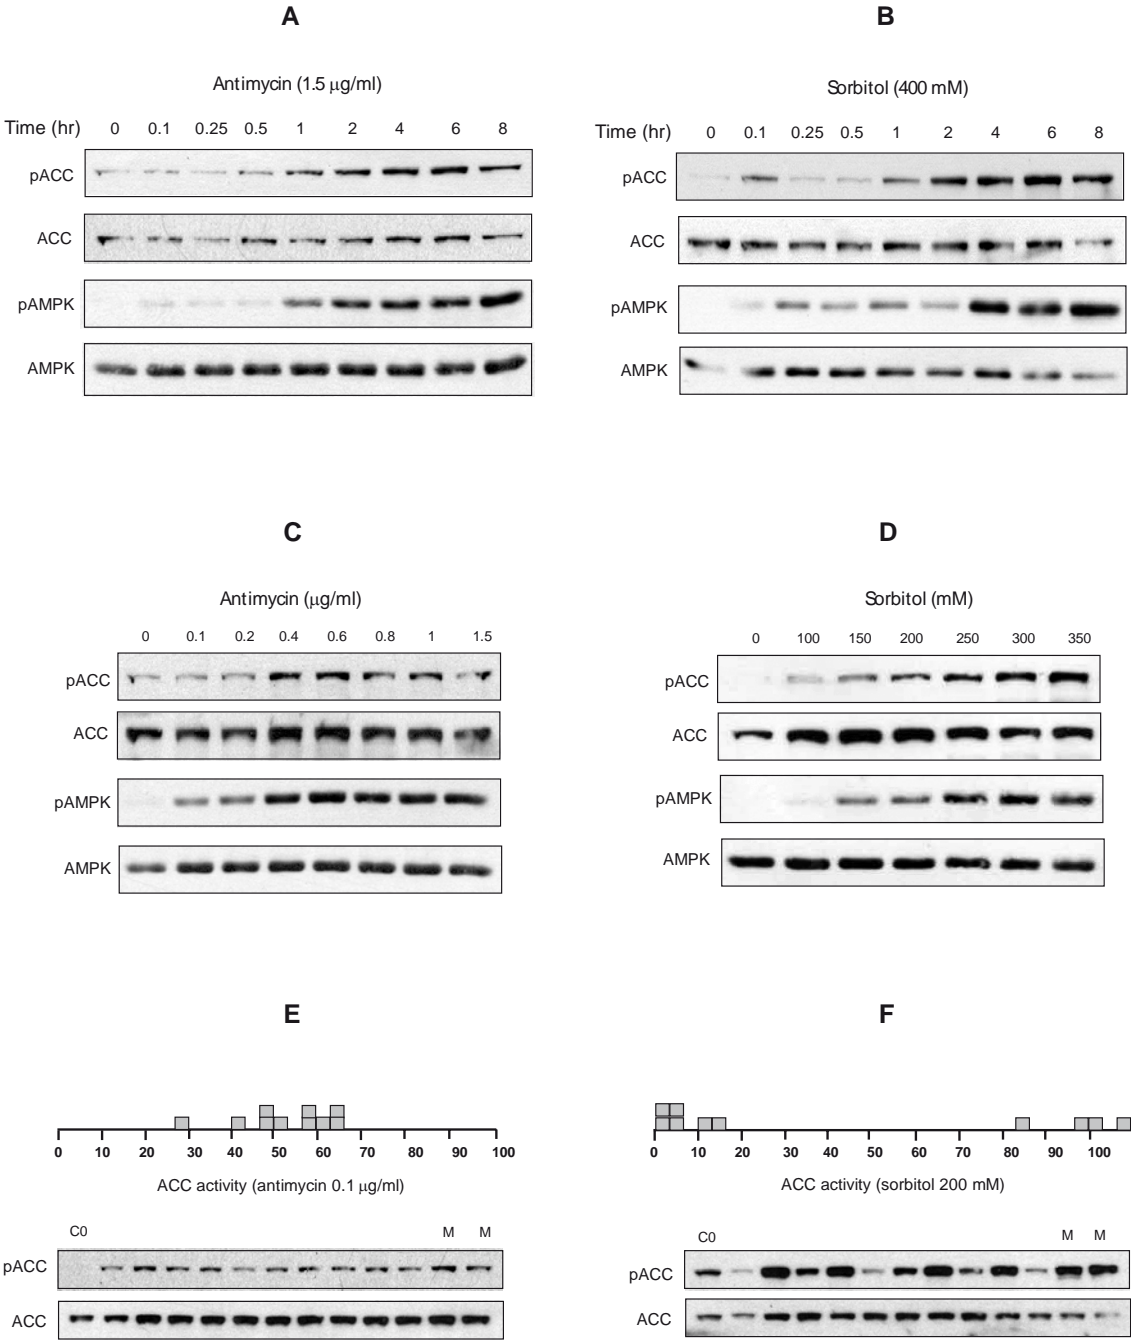

Supplement: supp_M109.026054_jbc.M109.026054-1.pdf [file supp_M109.026054_jbc.M109.026054-1.pdf]
